# Supplementary material for: Transesterification or polymerization? Reaction mechanism and kinetics of 2-(diethylamino)ethyl methacrylate with methanol and the competitive effect on free-radical polymerization
Source: Royal Society of Chemistry journal article supplement (doi:10.1039/d4re00406j), 2024-10-21
Supplement: d4re00406j1.pdf [file d4re00406j1.pdf]

## Supporting Information

# Transesterification or Polymerization? Kinetics of 2-(diethylamino)ethyl methacrylate in methanol and its competitive effect on free- radical polymerization

Judith Cabello-Romero,<sup>a</sup> Román Torres-Lubián,<sup>a</sup> Francisco Javier Enríquez-Medrano,<sup>a</sup>

Adrián Ochoa-Terán,<sup>b</sup> Jesús Jara-Cortez,<sup>c</sup> Iván Zapata-González<sup>d,\*</sup>

- a. Department of Macromolecular and Nanomaterial Chemistry, Centro de Investigación en Química Aplicada
- b. Centro de Graduados e Investigación en Química, Instituto Tecnológico de Tijuana.
- c. Universidad Académica de Ciencias Básicas e Ingeniería, Universidad Autónoma de Nayarit.
- d. Department of Polymerization Processes, Centro de Investigación en Química Aplicada.

Author correspondence email: [ivan.zapata@ciqa.edu.mx](mailto:ivan.zapata@ciqa.edu.mx)

# Content

|                                                                                                                                   |    |
|-----------------------------------------------------------------------------------------------------------------------------------|----|
| S.1. Reaction coordinate diagram and participating species .....                                                                  | 3  |
| S.2. Relevant molecular geometries for the DEAEMA-methanol transesterification reaction (1 molecule of CH <sub>3</sub> OH) .....  | 5  |
| S.3. Relevant molecular geometries for the DEAEMA-methanol transesterification reaction (2 molecules of CH <sub>3</sub> OH) ..... | 13 |
| S.4. <sup>1</sup> H-NMR Spectra and Peak Assignments.....                                                                         | 14 |
| S.5. Kinetic study using a pseudo-first-order reaction. ....                                                                      | 16 |
| S.6. Validation of <i>pseudo</i> -first-order reaction, experimental data <i>versus</i> model.....                                | 17 |
| S.7. Estimation of the nonlinear equations for the Arrhenius parameters $A$ and $E_A$ with the variation of $\omega_{M0}$ .....   | 18 |
| S.8. Calculations of transesterification, conversion, remaining monomer composition and copolymer composition. ....               | 19 |
| S.9. NMR spectroscopy and DSC of copolymers. ....                                                                                 | 21 |
| S.10. Precipitated polymer .....                                                                                                  | 26 |

## S.1. Reaction coordinate diagram and species

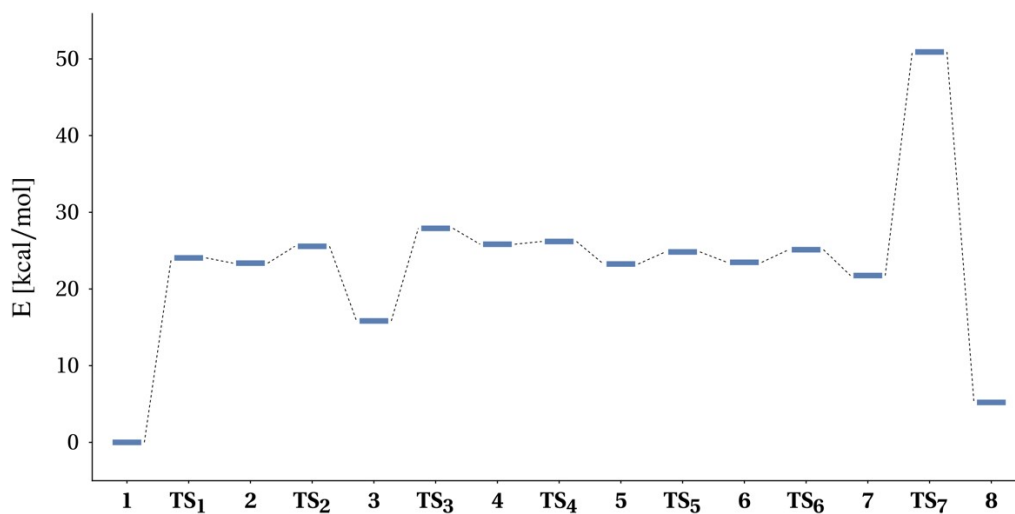

**Figure S1.** Reaction scheme for the transesterification process of DEAEMA with a methanol molecule, obtained from electronic structure calculations at the UB3LYP-PCM(methanol)/def2TZVP level of theory. Bold numbers denote minima (reactants, intermediaries and products) on the potential energy surface, while **TS<sub>i</sub>** denotes the *i*-th transition state. Energies are referenced to 1.

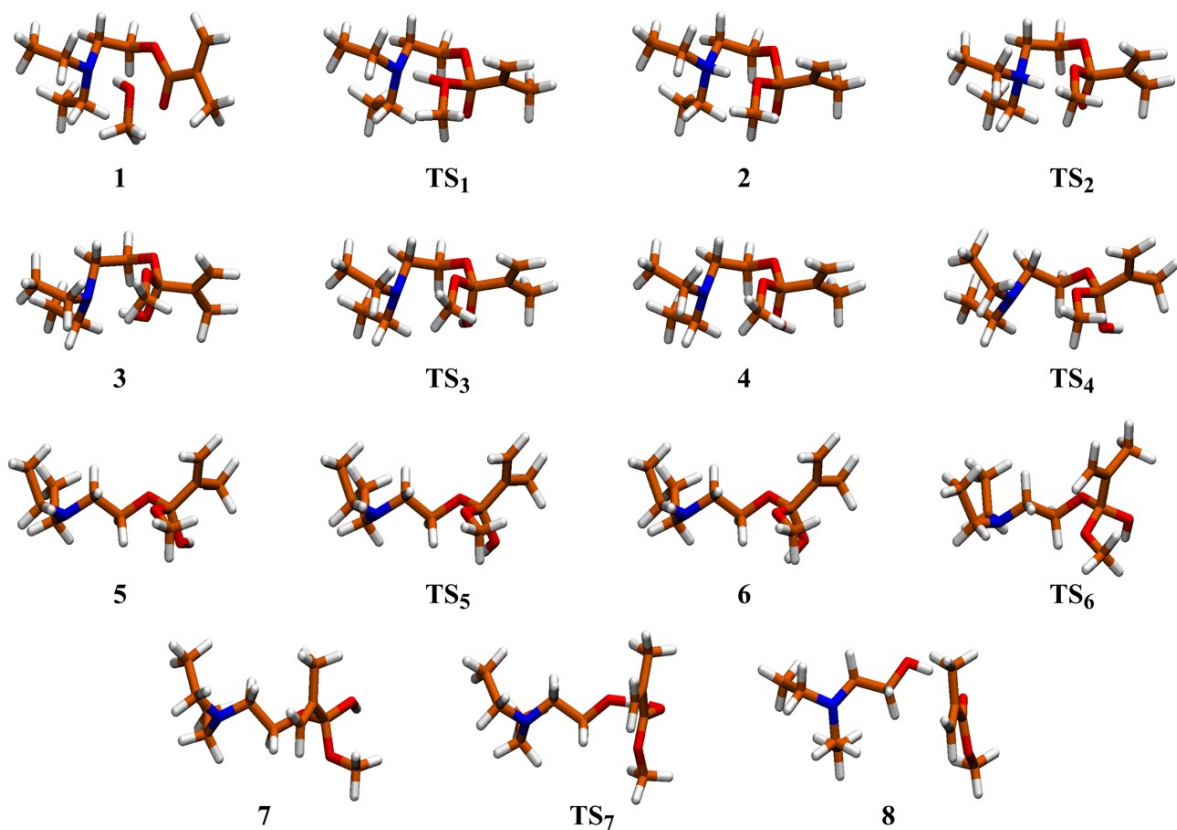

**Figure S2.** Molecular structures of the stationary points shown in the scheme of the transesterification reaction of DEAEMA with methanol (see Fig. S1).

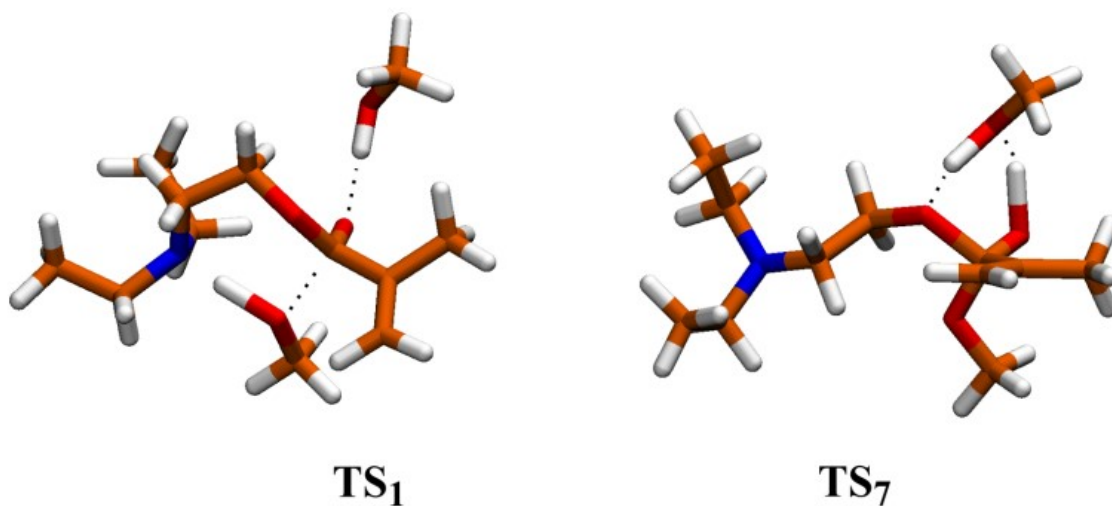

**Figure S3.** Molecular structures of the transition states analogous to TS<sub>1</sub> and TS<sub>7</sub> (see Fig. S2), considering two explicit solvent molecules.

## S.2. Relevant molecular geometries for the DEAEMA-methanol transesterification reaction

|             |             |           |           |           |           |               |                          |
|-------------|-------------|-----------|-----------|-----------|-----------|---------------|--------------------------|
| Structure 1 |             | H         | -4.041745 | -0.760813 | -1.583540 |               |                          |
| EE          | -713.780734 |           |           |           |           | Structure TS1 |                          |
| C           | 3.388610    | 0.441234  | -1.653310 |           |           | EE            | -713.742406              |
| C           | 3.017391    | 0.363960  | -0.376246 |           |           | i             | -272.96 cm <sup>-1</sup> |
| C           | 3.723072    | 1.077599  | 0.736536  |           |           | C             | 3.056869                 |
| C           | 1.870645    | -0.490876 | 0.043013  |           |           | C             | 2.900726                 |
| O           | 1.643127    | -0.766476 | 1.202604  |           |           | C             | 4.064184                 |
| O           | 1.140999    | -0.943190 | -0.988687 |           |           | C             | 1.554651                 |
| C           | 0.043786    | -1.841552 | -0.729247 |           |           | O             | 1.389045                 |
| C           | -1.281031   | -1.189363 | -1.073855 |           |           | O             | 1.154184                 |
| N           | -1.668164   | -0.110304 | -0.170719 |           |           | C             | 0.148014                 |
| H           | -0.382807   | 1.214923  | -0.054711 |           |           | C             | -1.229719                |
| C           | -2.717808   | 0.752955  | -0.730130 |           |           | N             | -1.697747                |
| C           | -1.866791   | -0.512258 | 1.233578  |           |           | H             | -0.817382                |
| C           | -2.710405   | -1.759549 | 1.507691  |           |           | C             | -2.772482                |
| C           | -4.098783   | 0.140183  | -0.970995 |           |           | C             | -1.970088                |
| O           | 0.206490    | 2.000708  | 0.050906  |           |           | C             | -2.689769                |
| C           | 0.160606    | 2.407609  | 1.407829  |           |           | C             | -4.102239                |
| H           | 0.794366    | 3.288656  | 1.516701  |           |           | O             | 0.399412                 |
| H           | 0.535421    | 1.626601  | 2.077584  |           |           | C             | 0.342159                 |
| H           | -0.854360   | 2.676955  | 1.722508  |           |           | H             | 1.118557                 |
| H           | 2.860425    | -0.090324 | -2.431101 |           |           | H             | 0.473946                 |
| H           | 4.238303    | 1.044239  | -1.947366 |           |           | H             | -0.631768                |
| H           | 4.546984    | 1.673718  | 0.347535  |           |           | H             | 2.207766                 |
| H           | 3.033536    | 1.734308  | 1.269266  |           |           | H             | 4.047811                 |
| H           | 4.115342    | 0.368939  | 1.468023  |           |           | H             | 5.010463                 |
| H           | 0.198943    | -2.697739 | -1.384619 |           |           | H             | 4.059280                 |
| H           | 0.088622    | -2.172948 | 0.304382  |           |           | H             | 4.000067                 |
| H           | -2.028315   | -1.992537 | -1.119393 |           |           | H             | 0.381387                 |
| H           | -1.209688   | -0.771571 | -2.079791 |           |           | H             | 0.175196                 |
| H           | -2.331527   | 1.137728  | -1.677213 |           |           | H             | -1.951179                |
| H           | -2.816831   | 1.612114  | -0.063328 |           |           | H             | -1.185692                |
| H           | -2.309105   | 0.345504  | 1.742109  |           |           | H             | -2.357447                |
| H           | -0.880412   | -0.658470 | 1.677379  |           |           | H             | -2.900341                |
| H           | -2.255627   | -2.658656 | 1.089885  |           |           | H             | -2.537684                |
| H           | -3.720897   | -1.679033 | 1.111147  |           |           | H             | -0.994813                |
| H           | -2.782728   | -1.904964 | 2.587185  |           |           | H             | -2.083378                |
| H           | -4.724284   | 0.861858  | -1.500252 |           |           | H             | -3.645368                |
| H           | -4.601362   | -0.110373 | -0.037517 |           |           | H             | -2.882232                |

H -4.754030 0.674695 -1.632516  
H -4.599858 -0.131259 -0.077281  
H -3.994263 -0.910709 -1.548515

H -4.807158 0.458934 -1.680403  
H -4.617344 -0.306300 -0.108928  
H -4.008061 -1.105088 -1.568993

Structure 2

EE -713.743494

C 3.134927 1.749891 -0.885019  
C 2.889138 0.644018 -0.188728  
C 3.983034 -0.272516 0.275066  
C 1.485874 0.185264 0.215992  
O 1.341027 -0.262148 1.392316  
O 1.109846 -0.740945 -0.891052  
C 0.163521 -1.734317 -0.567961  
C -1.242330 -1.332263 -0.991466  
N -1.724191 -0.138140 -0.229058  
H -0.891072 0.527146 -0.229691  
C -2.823115 0.604106 -0.931105  
C -1.976585 -0.393706 1.240766  
C -2.667130 -1.700387 1.585967  
C -4.134408 -0.144334 -1.070670  
O 0.491568 1.342481 -0.095963  
C 0.422947 2.324742 0.924872  
H 1.314323 2.958564 0.921589  
H 0.324784 1.860560 1.908136  
H -0.451316 2.947569 0.728624  
H 2.337107 2.397299 -1.219274  
H 4.149652 2.034026 -1.140776  
H 4.959760 0.076067 -0.061300  
H 3.986296 -0.345348 1.363745  
H 3.822720 -1.284409 -0.106398  
H 0.423011 -2.640769 -1.119639  
H 0.211354 -1.957648 0.499603  
H -1.943735 -2.152374 -0.862035  
H -1.235382 -1.045527 -2.041885  
H -2.421730 0.862871 -1.910025  
H -2.963934 1.530421 -0.375924  
H -2.555533 0.458738 1.591504  
H -0.992427 -0.350950 1.705967  
H -2.041773 -2.564523 1.366086  
H -3.623258 -1.827665 1.083188  
H -2.853669 -1.700239 2.660382

Structure TS2

EE -713.739993 i -87.39 cm<sup>-1</sup>

C 3.515004 1.113523 -1.197169  
C 3.014831 0.195167 -0.375709  
C 3.881998 -0.789999 0.349975  
C 1.515499 0.039153 -0.099941  
O 1.175826 -0.261025 1.098034  
O 1.096731 -0.946878 -1.138709  
C 0.017230 -1.781714 -0.788792  
C -1.341739 -1.112643 -0.954877  
N -1.611945 -0.110090 0.130821  
H -0.703866 0.379636 0.233505  
C -2.577334 0.961868 -0.291705  
C -1.895964 -0.708676 1.491901  
C -2.763028 -1.953388 1.507030  
C -3.988354 0.486409 -0.571756  
O 0.773651 1.257830 -0.599681  
C 0.877059 2.384081 0.256437  
H 1.899287 2.771612 0.292771  
H 0.562982 2.142679 1.275707  
H 0.220876 3.156021 -0.147268  
H 4.582640 1.186849 -1.372162  
H 2.876460 1.813588 -1.717366  
H 4.930246 -0.671722 0.074024  
H 3.783039 -0.666880 1.429637  
H 3.574103 -1.813959 0.122688  
H 0.044536 -2.629186 -1.475925  
H 0.138577 -2.161681 0.228158  
H -2.144521 -1.843662 -0.962336  
H -1.359211 -0.565454 -1.895115  
H -2.133028 1.416030 -1.175720  
H -2.567770 1.704534 0.504593  
H -2.350956 0.091009 2.073367  
H -0.913430 -0.911602 1.909593

|   |           |           |           |
|---|-----------|-----------|-----------|
| H | -2.263386 | -2.807614 | 1.052352  |
| H | -3.725076 | -1.812855 | 1.018641  |
| H | -2.954255 | -2.206639 | 2.550265  |
| H | -4.561868 | 1.331847  | -0.951724 |
| H | -4.485633 | 0.128553  | 0.327839  |
| H | -4.015746 | -0.298384 | -1.327000 |

|   |           |           |           |
|---|-----------|-----------|-----------|
| H | -2.478194 | 1.513308  | 1.233315  |
| H | -2.407971 | -0.426928 | 2.392691  |
| H | -1.181365 | -1.596673 | 1.973727  |
| H | -2.800996 | -2.932993 | 0.657150  |
| H | -4.072387 | -1.747258 | 0.958394  |
| H | -3.373128 | -2.660214 | 2.295869  |
| H | -4.358549 | 1.777434  | -0.407058 |
| H | -4.548539 | 0.318978  | 0.561335  |
| H | -3.976344 | 0.205085  | -1.108181 |

Structure 3

EE -713.755502

|   |           |           |           |
|---|-----------|-----------|-----------|
| C | 3.628626  | 1.058119  | -1.045775 |
| C | 2.931112  | 0.295216  | -0.212445 |
| C | 3.567581  | -0.622343 | 0.787990  |
| C | 1.407627  | 0.249186  | -0.272817 |
| O | 0.901098  | 0.159162  | 1.004447  |
| O | 1.097688  | -0.873902 | -1.082348 |
| C | -0.043587 | -1.676762 | -0.761888 |
| C | -1.386953 | -0.951921 | -0.783827 |
| N | -1.679861 | -0.239654 | 0.467171  |
| H | -0.108706 | 0.134712  | 0.910459  |
| C | -2.484133 | 0.974945  | 0.283006  |
| C | -2.079235 | -1.098304 | 1.598265  |
| C | -3.146555 | -2.165077 | 1.349868  |
| C | -3.925824 | 0.798054  | -0.193494 |
| O | 0.840758  | 1.350032  | -0.972455 |
| C | 0.847408  | 2.595204  | -0.280339 |
| H | 1.850812  | 2.864027  | 0.056029  |
| H | 0.177403  | 2.579432  | 0.580672  |
| H | 0.497242  | 3.339286  | -0.993436 |
| H | 4.711490  | 1.051524  | -1.032524 |
| H | 3.142308  | 1.703434  | -1.763845 |
| H | 4.652125  | -0.616687 | 0.683449  |
| H | 3.310667  | -0.327488 | 1.806677  |
| H | 3.208769  | -1.645835 | 0.655051  |
| H | -0.046087 | -2.442381 | -1.536494 |
| H | 0.111818  | -2.176067 | 0.197805  |
| H | -2.164652 | -1.682127 | -1.027485 |
| H | -1.367882 | -0.222080 | -1.591942 |
| H | -1.943829 | 1.595070  | -0.434169 |

Structure TS3

EE -713.736262 i -380.83 cm<sup>-1</sup>

|   |           |           |           |
|---|-----------|-----------|-----------|
| C | 3.471475  | 1.296967  | -1.342978 |
| C | 3.085206  | 0.324531  | -0.525791 |
| C | 4.039627  | -0.645335 | 0.105232  |
| C | 1.605429  | 0.114329  | -0.189374 |
| O | 1.472275  | 0.015222  | 1.214007  |
| O | 1.238427  | -1.055827 | -0.857095 |
| C | 0.032463  | -1.763931 | -0.521671 |
| C | -1.287050 | -1.051438 | -0.798021 |
| N | -1.744697 | -0.184648 | 0.270378  |
| H | 1.185145  | -0.872226 | 1.451462  |
| C | -2.559612 | 0.935518  | -0.168911 |
| C | -2.141753 | -0.834259 | 1.511474  |
| C | -3.165834 | -1.974602 | 1.432488  |
| C | -3.940766 | 0.622168  | -0.759989 |
| O | 0.799314  | 1.152069  | -0.672585 |
| C | 0.661026  | 2.299942  | 0.156694  |
| H | 1.630442  | 2.670931  | 0.497516  |
| H | 0.030220  | 2.081547  | 1.017368  |
| H | 0.185765  | 3.060226  | -0.460128 |
| H | 4.517200  | 1.433382  | -1.589603 |
| H | 2.759701  | 1.977467  | -1.787636 |
| H | 5.053270  | -0.486115 | -0.260733 |
| H | 4.040627  | -0.539824 | 1.191583  |
| H | 3.747020  | -1.674251 | -0.115704 |
| H | 0.092561  | -2.649475 | -1.152582 |
| H | 0.071661  | -2.120619 | 0.512799  |

|   |           |           |           |   |           |           |           |
|---|-----------|-----------|-----------|---|-----------|-----------|-----------|
| H | -2.018306 | -1.835480 | -1.050127 | H | 3.617960  | -1.650835 | -0.072760 |
| H | -1.159921 | -0.448075 | -1.696607 | H | 0.026714  | -2.597196 | -1.090999 |
| H | -1.975067 | 1.479016  | -0.915717 | H | 0.040106  | -1.982475 | 0.560792  |
| H | -2.681232 | 1.611230  | 0.682007  | H | -2.102701 | -1.827063 | -0.970871 |
| H | -2.524894 | -0.051482 | 2.169261  | H | -1.285311 | -0.453751 | -1.694474 |
| H | -1.246474 | -1.224293 | 2.007859  | H | -2.112427 | 1.505747  | -0.966096 |
| H | -2.791364 | -2.813042 | 0.842891  | H | -2.802776 | 1.673252  | 0.635459  |
| H | -4.108949 | -1.650408 | 0.993892  | H | -2.526309 | 0.100829  | 2.194886  |
| H | -3.370155 | -2.348466 | 2.438178  | H | -1.244286 | -1.069443 | 2.015384  |
| H | -4.393833 | 1.537446  | -1.148647 | H | -2.846995 | -2.709146 | 0.988564  |
| H | -4.617311 | 0.207888  | -0.012210 | H | -4.159851 | -1.546729 | 1.179841  |
| H | -3.868171 | -0.089742 | -1.584611 | H | -3.335156 | -2.196656 | 2.599931  |
|   |           |           |           | H | -4.538135 | 1.508339  | -1.166926 |
|   |           |           |           | H | -4.715587 | 0.204111  | 0.007513  |
|   |           |           |           | H | -3.979619 | -0.117583 | -1.566010 |

#### Structure 4

EE -713.739563

|   |           |           |           |
|---|-----------|-----------|-----------|
| C | 3.399135  | 1.370051  | -1.231955 |
| C | 2.999328  | 0.373601  | -0.451802 |
| C | 3.948926  | -0.631293 | 0.136165  |
| C | 1.513706  | 0.171460  | -0.134294 |
| O | 1.308826  | -0.004885 | 1.247648  |
| O | 1.130407  | -0.953994 | -0.875325 |
| C | -0.040572 | -1.692743 | -0.486841 |
| C | -1.380759 | -1.019309 | -0.766658 |
| N | -1.836593 | -0.114641 | 0.269318  |
| H | 1.977710  | -0.609826 | 1.588733  |
| C | -2.676741 | 0.972983  | -0.195014 |
| C | -2.168632 | -0.708310 | 1.553994  |
| C | -3.190836 | -1.853750 | 1.572742  |
| C | -4.058737 | 0.614537  | -0.759825 |
| O | 0.722660  | 1.238410  | -0.556116 |
| C | 0.604955  | 2.354527  | 0.319083  |
| H | 1.577813  | 2.677680  | 0.695270  |
| H | -0.052771 | 2.121906  | 1.155819  |
| H | 0.167521  | 3.155003  | -0.274842 |
| H | 4.446140  | 1.500536  | -1.475831 |
| H | 2.695818  | 2.075843  | -1.649907 |
| H | 4.949500  | -0.502515 | -0.273664 |
| H | 4.030450  | -0.527558 | 1.222909  |

#### Structure TS4

EE -713.738997 i -37.94 cm<sup>-1</sup>

|   |           |           |           |
|---|-----------|-----------|-----------|
| C | 3.140882  | 1.231054  | -1.760275 |
| C | 3.105166  | 0.338152  | -0.779135 |
| C | 4.280208  | -0.522531 | -0.414566 |
| C | 1.819965  | 0.108278  | 0.019868  |
| O | 2.081616  | 0.027840  | 1.407722  |
| O | 1.288551  | -1.085771 | -0.475382 |
| C | 0.106760  | -1.603622 | 0.167993  |
| C | -1.199518 | -1.059288 | -0.431663 |
| N | -1.987395 | -0.289869 | 0.517973  |
| H | 2.742262  | -0.658910 | 1.557821  |
| C | -2.720278 | 0.829503  | -0.055057 |
| C | -2.663375 | -1.072097 | 1.542976  |
| C | -3.813086 | -1.995108 | 1.112569  |
| C | -3.721336 | 0.534843  | -1.181321 |
| O | 0.868050  | 1.109697  | -0.154107 |
| C | 1.063001  | 2.330346  | 0.556849  |
| H | 2.073360  | 2.719230  | 0.417016  |
| H | 0.869292  | 2.199860  | 1.621231  |
| H | 0.345886  | 3.034552  | 0.140025  |
| H | 4.039602  | 1.379175  | -2.345830 |



|   |           |           |           |   |           |           |           |
|---|-----------|-----------|-----------|---|-----------|-----------|-----------|
| H | 2.278335  | 1.833188  | -2.008296 | H | 1.979252  | 2.785932  | 1.456233  |
| H | 5.088751  | -0.396196 | -1.132848 | H | 1.387663  | 3.582264  | -0.022067 |
| H | 4.673733  | -0.267079 | 0.573383  | H | 3.852600  | 0.597274  | -2.770742 |
| H | 4.000929  | -1.578780 | -0.394569 | H | 2.397691  | 1.606875  | -2.237586 |
| H | 0.182163  | -2.681425 | 0.028362  | H | 4.587080  | -1.262504 | -1.459009 |
| H | 0.151254  | -1.388949 | 1.234455  | H | 4.563686  | -0.833961 | 0.250164  |
| H | -1.768856 | -1.892766 | -0.867625 | H | 3.375393  | -1.971396 | -0.384001 |
| H | -0.929589 | -0.404709 | -1.257640 | H | -0.353300 | -1.636474 | 1.119625  |
| H | -1.977507 | 1.535753  | -0.439186 | H | -0.076125 | 0.048323  | 1.571004  |
| H | -3.238605 | 1.333902  | 0.764816  | H | -1.482441 | -0.833973 | -0.989055 |
| H | -3.033692 | -0.374156 | 2.298886  | H | -1.236025 | 0.821798  | -0.452705 |
| H | -1.904919 | -1.683225 | 2.040972  | H | -3.231574 | 1.712186  | 0.098517  |
| H | -3.514005 | -2.661060 | 0.301318  | H | -4.465606 | 0.779813  | 0.923495  |
| H | -4.685344 | -1.430999 | 0.784467  | H | -4.086678 | -1.307916 | 1.636978  |
| H | -4.117618 | -2.618200 | 1.956734  | H | -2.448189 | -1.790708 | 1.995536  |
| H | -4.125585 | 1.474060  | -1.566731 | H | -2.230432 | -2.869787 | -0.251649 |
| H | -4.557039 | -0.076571 | -0.843899 | H | -3.884169 | -2.401675 | -0.645431 |
| H | -3.238553 | 0.018212  | -2.012938 | H | -3.571088 | -3.519498 | 0.684832  |
|   |           |           |           | H | -4.971183 | 1.171739  | -1.500784 |
|   |           |           |           | H | -4.893881 | -0.550480 | -1.133432 |
|   |           |           |           | H | -3.543996 | 0.239635  | -1.956762 |

#### Structure 5

EE -713.743671

|   |           |           |           |
|---|-----------|-----------|-----------|
| C | 3.086566  | 0.799673  | -2.032736 |
| C | 3.000176  | 0.076179  | -0.923555 |
| C | 3.931972  | -1.059228 | -0.613387 |
| C | 1.893693  | 0.343298  | 0.098524  |
| O | 2.395011  | 0.330483  | 1.423170  |
| O | 0.952974  | -0.668003 | -0.098960 |
| C | -0.222769 | -0.626571 | 0.729690  |
| C | -1.423766 | -0.191653 | -0.097867 |
| N | -2.644728 | -0.174985 | 0.690184  |
| H | 2.794064  | -0.531743 | 1.590368  |
| C | -3.676121 | 0.715245  | 0.170001  |
| C | -3.107812 | -1.472792 | 1.182346  |
| C | -3.204403 | -2.625577 | 0.175679  |
| C | -4.305142 | 0.365479  | -1.184561 |
| O | 1.252599  | 1.569367  | -0.073214 |
| C | 1.948860  | 2.735939  | 0.368231  |
| H | 2.966400  | 2.765409  | -0.024803 |

#### Structure TS5

EE -713.741164 i -319.10 cm<sup>-1</sup>

|   |           |           |           |
|---|-----------|-----------|-----------|
| C | 3.015016  | 0.879913  | -2.050076 |
| C | 2.972594  | 0.089825  | -0.984125 |
| C | 3.879807  | -1.089434 | -0.797145 |
| C | 1.942071  | 0.316633  | 0.121023  |
| O | 2.603435  | 0.259202  | 1.375478  |
| O | 1.004561  | -0.706834 | -0.005093 |
| C | -0.193412 | -0.608775 | 0.789800  |
| C | -1.371131 | -0.215920 | -0.090311 |
| N | -2.609384 | -0.152607 | 0.666392  |
| H | 2.166341  | -0.400943 | 1.924882  |
| C | -3.619751 | 0.722292  | 0.082338  |
| C | -3.096274 | -1.422002 | 1.207859  |
| C | -3.179204 | -2.620041 | 0.254462  |
| C | -4.221828 | 0.314415  | -1.267980 |

|   |            |            |            |   |            |            |            |
|---|------------|------------|------------|---|------------|------------|------------|
| O | 1. 261665  | 1. 536620  | 0. 002402  | C | -3. 093914 | -1. 460048 | 1. 190967  |
| C | 1. 935696  | 2. 701438  | 0. 475220  | C | -3. 184047 | -2. 637390 | 0. 212745  |
| H | 2. 937402  | 2. 785467  | 0. 049220  | C | -4. 312788 | 0. 311990  | -1. 212717 |
| H | 2. 006180  | 2. 700033  | 1. 562580  | O | 1. 327949  | 1. 558085  | 0. 039843  |
| H | 1. 334449  | 3. 546772  | 0. 147317  | C | 2. 099630  | 2. 679295  | 0. 471772  |
| H | 3. 729075  | 0. 702206  | -2. 844460 | H | 3. 080133  | 2. 696846  | -0. 006057 |
| H | 2. 340951  | 1. 716737  | -2. 163947 | H | 2. 227960  | 2. 682261  | 1. 554972  |
| H | 4. 506398  | -1. 238525 | -1. 675672 | H | 1. 536923  | 3. 561238  | 0. 173683  |
| H | 4. 522497  | -0. 951628 | 0. 073779  | H | 3. 758979  | 0. 637366  | -2. 840805 |
| H | 3. 299809  | -1. 998796 | -0. 624145 | H | 2. 346034  | 1. 641200  | -2. 195503 |
| H | -0. 339112 | -1. 594386 | 1. 232135  | H | 4. 578091  | -1. 243357 | -1. 607709 |
| H | -0. 073182 | 0. 117372  | 1. 593622  | H | 4. 562711  | -0. 924751 | 0. 135993  |
| H | -1. 408186 | -0. 907682 | -0. 944651 | H | 3. 372774  | -2. 010103 | -0. 558014 |
| H | -1. 169016 | 0. 775323  | -0. 495363 | H | -0. 335438 | -1. 618137 | 1. 115612  |
| H | -3. 163319 | 1. 710493  | -0. 025445 | H | -0. 096736 | 0. 081540  | 1. 532755  |
| H | -4. 424675 | 0. 829354  | 0. 814235  | H | -1. 481364 | -0. 862002 | -1. 003863 |
| H | -4. 084183 | -1. 227509 | 1. 629850  | H | -1. 236767 | 0. 805122  | -0. 501897 |
| H | -2. 459908 | -1. 706440 | 2. 051491  | H | -3. 238149 | 1. 697051  | 0. 028270  |
| H | -2. 197369 | -2. 893965 | -0. 135214 | H | -4. 463173 | 0. 781400  | 0. 884532  |
| H | -3. 835139 | -2. 428578 | -0. 593784 | H | -4. 073246 | -1. 289910 | 1. 642444  |
| H | -3. 568589 | -3. 485166 | 0. 795419  | H | -2. 431540 | -1. 753416 | 2. 011136  |
| H | -4. 873100 | 1. 110346  | -1. 636682 | H | -2. 208559 | -2. 888022 | -0. 207401 |
| H | -4. 820023 | -0. 593229 | -1. 187118 | H | -3. 863762 | -2. 436565 | -0. 614311 |
| H | -3. 444909 | 0. 146005  | -2. 016019 | H | -3. 547378 | -3. 520101 | 0. 743290  |
|   |            |            |            | H | -4. 983905 | 1. 106874  | -1. 546398 |
|   |            |            |            | H | -4. 897575 | -0. 604538 | -1. 133811 |
|   |            |            |            | H | -3. 555624 | 0. 168655  | -1. 985778 |

#### Structure 6

EE -713. 743322

|   |            |            |            |
|---|------------|------------|------------|
| C | 3. 037624  | 0. 822421  | -2. 055024 |
| C | 3. 006751  | 0. 062956  | -0. 967140 |
| C | 3. 935599  | -1. 092047 | -0. 741077 |
| C | 1. 947321  | 0. 297658  | 0. 105433  |
| O | 2. 570368  | 0. 114304  | 1. 355487  |
| O | 0. 949997  | -0. 651613 | -0. 134382 |
| C | -0. 215682 | -0. 616011 | 0. 702743  |
| C | -1. 422625 | -0. 201646 | -0. 126225 |
| N | -2. 639542 | -0. 171475 | 0. 666222  |
| H | 1. 927143  | 0. 292356  | 2. 054149  |
| C | -3. 677920 | 0. 700500  | 0. 128333  |

#### Structure TS6

EE -713. 740699 i -38. 33 cm<sup>-1</sup>

|   |            |            |            |
|---|------------|------------|------------|
| C | 1. 507234  | 2. 032930  | -1. 775497 |
| C | 2. 133520  | 0. 936491  | -1. 365496 |
| C | 3. 018253  | 0. 114908  | -2. 254494 |
| C | 1. 915030  | 0. 396253  | 0. 046723  |
| O | 3. 168263  | -0. 007180 | 0. 538524  |
| O | 1. 080471  | -0. 735894 | -0. 068209 |
| C | -0. 068922 | -0. 891846 | 0. 773798  |
| C | -1. 284781 | -0. 178460 | 0. 194645  |

|   |           |           |           |   |           |           |           |
|---|-----------|-----------|-----------|---|-----------|-----------|-----------|
| N | -2.467290 | -0.381228 | 1.014100  | O | 1.180577  | -0.802670 | 0.109771  |
| H | 3.016306  | -0.514433 | 1.347868  | C | -0.079535 | -0.525690 | 0.739085  |
| C | -3.476574 | 0.661715  | 0.872079  | C | -1.185104 | -0.503607 | -0.307007 |
| C | -2.969080 | -1.753689 | 1.086335  | N | -2.485864 | -0.250618 | 0.287669  |
| C | -3.167045 | -2.511848 | -0.231877 | H | 3.451882  | -1.127146 | -0.147828 |
| C | -4.178501 | 0.794926  | -0.485231 | C | -3.458744 | 0.325930  | -0.633274 |
| O | 1.300790  | 1.308602  | 0.908670  | C | -2.990628 | -1.286023 | 1.189975  |
| C | 2.120151  | 2.361743  | 1.415755  | C | -2.970065 | -2.736787 | 0.693865  |
| H | 2.656023  | 2.872217  | 0.614473  | C | -3.925458 | -0.537814 | -1.811628 |
| H | 2.836837  | 1.986702  | 2.146393  | O | 2.408546  | 0.587480  | 1.382577  |
| H | 1.439657  | 3.060015  | 1.897977  | C | 3.570309  | 1.389211  | 1.594864  |
| H | 1.618397  | 2.387550  | -2.792375 | H | 3.557980  | 2.288342  | 0.976918  |
| H | 0.861733  | 2.599144  | -1.119083 | H | 4.480207  | 0.824584  | 1.387496  |
| H | 3.013559  | 0.506318  | -3.271181 | H | 3.550834  | 1.673686  | 2.644734  |
| H | 4.045002  | 0.107281  | -1.885367 | H | 0.675021  | 3.284506  | -0.814375 |
| H | 2.682307  | -0.924123 | -2.277924 | H | 1.116306  | 2.626161  | 0.854684  |
| H | -0.229246 | -1.969210 | 0.807454  | H | 1.063132  | 1.987152  | -2.779769 |
| H | 0.126936  | -0.541924 | 1.786157  | H | 2.616110  | 1.140251  | -2.667459 |
| H | -1.408529 | -0.502564 | -0.849236 | H | 1.122685  | 0.233395  | -2.525210 |
| H | -1.072562 | 0.889825  | 0.170143  | H | -0.238690 | -1.318772 | 1.470130  |
| H | -2.988579 | 1.612790  | 1.104496  | H | -0.047659 | 0.421956  | 1.273329  |
| H | -4.229048 | 0.500050  | 1.648507  | H | -1.135642 | -1.437512 | -0.886057 |
| H | -3.916853 | -1.716423 | 1.627051  | H | -0.975471 | 0.308035  | -1.004534 |
| H | -2.288733 | -2.339288 | 1.712275  | H | -3.017240 | 1.244686  | -1.030488 |
| H | -2.226318 | -2.634081 | -0.771267 | H | -4.329259 | 0.628092  | -0.045204 |
| H | -3.871230 | -2.011073 | -0.895069 | H | -4.013882 | -1.007740 | 1.449732  |
| H | -3.553742 | -3.510843 | -0.019139 | H | -2.420422 | -1.240825 | 2.122777  |
| H | -4.818248 | 1.680588  | -0.484377 | H | -1.954044 | -3.077487 | 0.487700  |
| H | -4.807299 | -0.068546 | -0.702612 | H | -3.559619 | -2.872294 | -0.211958 |
| H | -3.457261 | 0.905254  | -1.297134 | H | -3.382401 | -3.388559 | 1.467105  |
|   |           |           |           | H | -4.558255 | 0.055672  | -2.475662 |
|   |           |           |           | H | -4.507528 | -1.397144 | -1.478667 |
|   |           |           |           | H | -3.079820 | -0.904124 | -2.396645 |

Structure 7

EE -713.746071

|   |          |           |           |
|---|----------|-----------|-----------|
| C | 1.108899 | 2.492205  | -0.217615 |
| C | 1.604125 | 1.401593  | -0.791306 |
| C | 1.598799 | 1.183986  | -2.275107 |
| C | 2.124159 | 0.239446  | 0.048303  |
| O | 3.240848 | -0.293200 | -0.591550 |

Structure TS7

EE -713.699612 i -1069.65 cm<sup>-1</sup>

|   |          |          |           |
|---|----------|----------|-----------|
| C | 2.142651 | 2.988710 | -1.311763 |
| C | 2.409670 | 1.688700 | -1.446365 |

|   |           |           |           |
|---|-----------|-----------|-----------|
| C | 2.624920  | 1.016150  | -2.768583 |
| C | 2.530689  | 0.825428  | -0.252863 |
| O | 3.208975  | -0.301034 | -0.296357 |
| O | 0.967039  | -0.436002 | -0.528617 |
| C | -0.116667 | -0.372024 | 0.350350  |
| C | -1.438994 | -0.379180 | -0.414413 |
| N | -2.596392 | -0.197621 | 0.447350  |
| H | 2.278225  | -0.879285 | -0.340653 |
| C | -3.785182 | 0.287849  | -0.242814 |
| C | -2.817629 | -1.243519 | 1.445043  |
| C | -2.818398 | -2.700581 | 0.965581  |
| C | -4.438912 | -0.632214 | -1.282450 |
| O | 2.317080  | 1.411988  | 0.901062  |
| C | 2.619826  | 0.682962  | 2.112023  |
| H | 3.684045  | 0.466657  | 2.156564  |
| H | 2.048081  | -0.240833 | 2.150362  |
| H | 2.325148  | 1.346031  | 2.918298  |
| H | 2.060019  | 3.626551  | -2.181806 |
| H | 2.004434  | 3.445073  | -0.342567 |
| H | 2.486402  | 1.726407  | -3.581710 |
| H | 3.631097  | 0.599018  | -2.834414 |
| H | 1.922666  | 0.191094  | -2.891432 |
| H | -0.080129 | -1.206121 | 1.064549  |
| H | -0.069565 | 0.552345  | 0.948466  |
| H | -1.481988 | -1.297384 | -1.020221 |
| H | -1.414716 | 0.455831  | -1.118920 |
| H | -3.507438 | 1.223593  | -0.737279 |
| H | -4.526276 | 0.546261  | 0.518607  |
| H | -3.770553 | -1.023524 | 1.931252  |
| H | -2.052234 | -1.146205 | 2.220806  |
| H | -1.860487 | -2.976806 | 0.521808  |
| H | -3.597422 | -2.893731 | 0.229239  |
| H | -2.987337 | -3.362002 | 1.818269  |
| H | -5.238640 | -0.095394 | -1.798282 |
| H | -4.877139 | -1.517652 | -0.821940 |
| H | -3.718389 | -0.959603 | -2.034084 |

Structure 8

EE -713.772436

|   |           |           |           |
|---|-----------|-----------|-----------|
| C | 2.433341  | 3.133056  | -0.223389 |
| C | 2.561429  | 1.978896  | -0.878079 |
| C | 2.374781  | 1.838935  | -2.359824 |
| C | 2.885407  | 0.723492  | -0.148374 |
| O | 2.866753  | -0.377103 | -0.673869 |
| O | 0.389087  | -1.132603 | -1.809452 |
| C | -0.406119 | -0.433532 | -0.855929 |
| C | -1.853339 | -0.852208 | -1.052834 |
| N | -2.765755 | -0.098347 | -0.210336 |
| H | 1.319027  | -0.975979 | -1.577944 |
| C | -4.145874 | -0.095182 | -0.680626 |
| C | -2.578428 | -0.254833 | 1.231748  |
| C | -2.500094 | -1.680329 | 1.792080  |
| C | -4.908329 | -1.426524 | -0.678529 |
| O | 3.198394  | 0.898408  | 1.135228  |
| C | 3.468845  | -0.291540 | 1.900340  |
| H | 4.327378  | -0.818114 | 1.487753  |
| H | 2.599887  | -0.947242 | 1.894915  |
| H | 3.680565  | 0.054839  | 2.906776  |
| H | 2.183732  | 4.043884  | -0.752109 |
| H | 2.567842  | 3.197639  | 0.846338  |
| H | 2.163097  | 2.807751  | -2.808452 |
| H | 3.269896  | 1.423325  | -2.826698 |
| H | 1.553251  | 1.159191  | -2.591844 |
| H | -0.067510 | -0.667355 | 0.158477  |
| H | -0.324003 | 0.651402  | -0.992808 |
| H | -1.920991 | -1.941626 | -0.913250 |
| H | -2.120620 | -0.654942 | -2.093826 |
| H | -4.133872 | 0.294402  | -1.702932 |
| H | -4.696751 | 0.631219  | -0.077282 |
| H | -3.397118 | 0.279719  | 1.717866  |
| H | -1.662325 | 0.270482  | 1.518454  |
| H | -1.659420 | -2.232732 | 1.368929  |
| H | -3.407519 | -2.251035 | 1.599497  |
| H | -2.351275 | -1.635972 | 2.873175  |
| H | -5.879016 | -1.295097 | -1.162401 |
| H | -5.088578 | -1.789130 | 0.333427  |
| H | -4.365100 | -2.198684 | -1.226220 |

### S.3. Relevant molecular geometries for the DEAEMA-methanol transesterification reaction

|              |             |     |                          |              |             |           |                           |
|--------------|-------------|-----|--------------------------|--------------|-------------|-----------|---------------------------|
| TS1 - analog |             |     |                          | H            | -4.602065   | -0.121259 | -0.044386                 |
| EE           | -829.276232 | i   | -334.00 cm <sup>-1</sup> | H            | -4.008028   | -0.884941 | -1.535211                 |
| C            | 3.034439    | 1.  | 768092                   | C            | 2.697031    | -3.381314 | 1.799934                  |
| C            | 2.920353    | 0.  | 710368                   | H            | 2.749675    | -4.405470 | 2.179133                  |
| C            | 4.112082    | -0. | 003912                   | H            | 2.418165    | -3.419204 | 0.737789                  |
| C            | 1.594476    | 0.  | 088447                   | H            | 3.695128    | -2.929626 | 1.879593                  |
| O            | 1.406140    | -0. | 241374                   | O            | 1.732833    | -2.678303 | 2.575979                  |
| O            | 1.183407    | -0. | 769031                   | H            | 1.625881    | -1.781446 | 2.184430                  |
| C            | 0.131337    | -1. | 699706                   |              |             |           |                           |
| C            | -1.228986   | -1. | 174845                   |              |             |           |                           |
| N            | -1.689573   | -0. | 010578                   | TS7 - analog |             |           |                           |
| H            | -0.777878   | 0.  | 700854                   | EE           | -829.503122 | i         | -1139.15 cm <sup>-1</sup> |
| C            | -2.773159   | 0.  | 773814                   | C            | 2.333904    | -0.479765 | -1.827950                 |
| C            | -1.954454   | -0. | 326194                   | C            | 2.831704    | -0.173833 | -0.634655                 |
| C            | -2.673192   | -1. | 639889                   | C            | 4.305258    | -0.041963 | -0.380566                 |
| C            | -4.110598   | 0.  | 064026                   | C            | 1.928848    | 0.106018  | 0.572704                  |
| O            | 0.367594    | 1.  | 447719                   | O            | 2.479190    | -0.043222 | 1.741497                  |
| C            | 0.334417    | 2.  | 415565                   | O            | 0.757224    | -0.997740 | 0.412207                  |
| H            | 1.123394    | 3.  | 165923                   | C            | -0.510287   | -0.690225 | 1.032972                  |
| H            | 0.475601    | 1.  | 947494                   | C            | -1.496250   | -0.220990 | -0.024007                 |
| H            | -0.635293   | 2.  | 931878                   | N            | -2.786867   | 0.104014  | 0.556425                  |
| H            | 2.158015    | 2.  | 262664                   | H            | 2.446383    | -1.394725 | 1.971167                  |
| H            | 4.013623    | 2.  | 159648                   | C            | -3.571801   | 1.049556  | -0.228893                 |
| H            | 5.045611    | 0.  | 461866                   | C            | -3.525636   | -1.015194 | 1.141595                  |
| H            | 4.070353    | 0.  | 009745                   | C            | -3.691764   | -2.282166 | 0.293856                  |
| H            | 4.124990    | -1. | 057599                   | C            | -4.069014   | 0.593107  | -1.606108                 |
| H            | 0.354059    | -2. | 593410                   | O            | 1.189394    | 1.289885  | 0.409414                  |
| H            | 0.140767    | -1. | 969612                   | C            | 1.948744    | 2.483780  | 0.570875                  |
| H            | -1.964727   | -1. | 980512                   | H            | 2.660383    | 2.611208  | -0.250045                 |
| H            | -1.161924   | -0. | 832955                   | H            | 2.483466    | 2.483534  | 1.521558                  |
| H            | -2.365745   | 1.  | 064446                   | H            | 1.235611    | 3.304757  | 0.553130                  |
| H            | -2.897544   | 1.  | 686927                   | H            | 2.984758    | -0.646322 | -2.677697                 |
| H            | -2.524247   | 0.  | 519946                   | H            | 1.269983    | -0.579873 | -1.989200                 |
| H            | -0.976339   | -0. | 318601                   | H            | 4.868355    | -0.200927 | -1.299639                 |
| H            | -2.065008   | -2. | 509889                   | H            | 4.553262    | 0.945435  | 0.014983                  |
| H            | -3.633021   | -1. | 724519                   | H            | 4.641295    | -0.762764 | 0.366946                  |
| H            | -2.862268   | -1. | 686771                   | H            | -0.845111   | -1.611482 | 1.511043                  |
| H            | -4.768949   | 0.  | 707138                   | H            | -0.374268   | 0.069337  | 1.801077                  |

|   |           |           |           |   |           |           |           |
|---|-----------|-----------|-----------|---|-----------|-----------|-----------|
| H | -1.545488 | -0.984145 | -0.814777 | H | -4.538952 | 1.431943  | -2.124845 |
| H | -1.091713 | 0.681969  | -0.479802 | H | -4.808211 | -0.204009 | -1.526343 |
| H | -2.955888 | 1.943760  | -0.361154 | H | -3.246505 | 0.235198  | -2.228158 |
| H | -4.429417 | 1.349357  | 0.379009  | C | 2.963269  | -3.334630 | 1.284684  |
| H | -4.510530 | -0.634187 | 1.418421  | H | 3.780786  | -3.484218 | 1.987736  |
| H | -3.038636 | -1.298982 | 2.079744  | H | 3.357397  | -2.964433 | 0.336818  |
| H | -2.728691 | -2.735575 | 0.053111  | H | 2.449459  | -4.279284 | 1.119314  |
| H | -4.214069 | -2.087711 | -0.641982 | O | 2.026259  | -2.404034 | 1.850216  |
| H | -4.267923 | -3.019764 | 0.856563  | H | 1.296728  | -1.902592 | 1.054378  |

#### S.4. $^1\text{H}$ -NMR Spectra and Peak Assignments

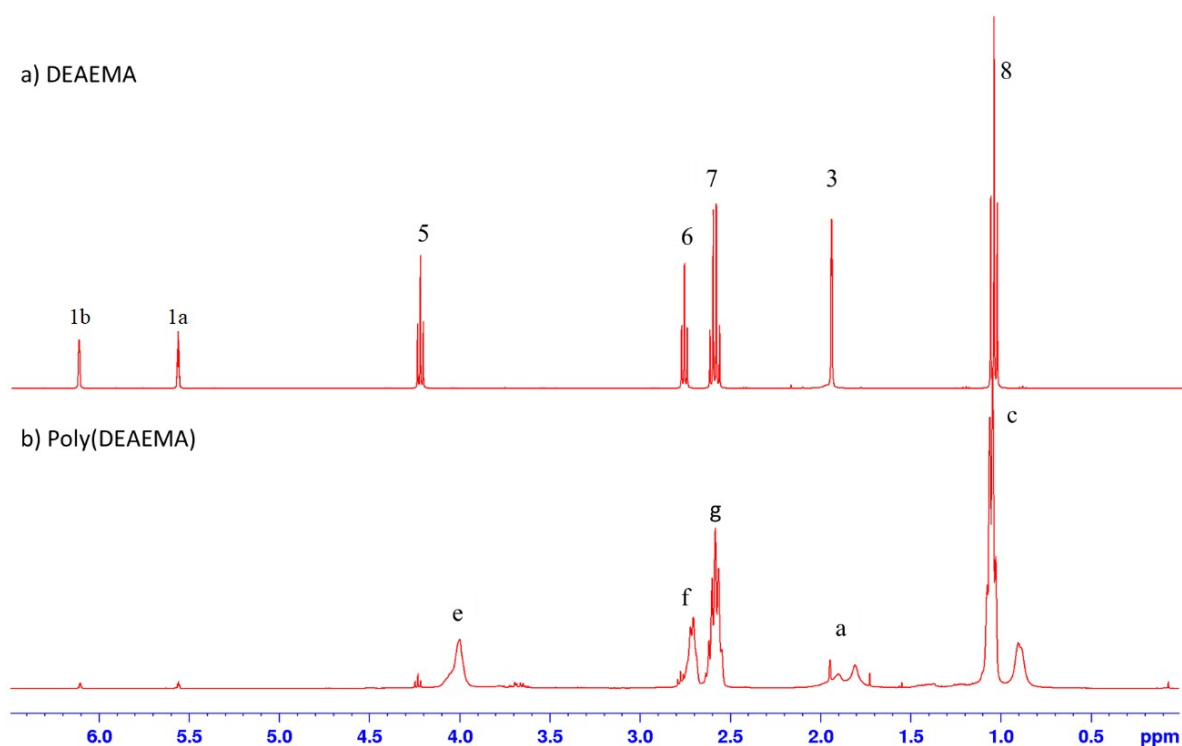

**Figure S4.**  $^1\text{H}$ -NMR (400 MHz) spectra in  $\text{CD}_3\text{Cl}$  at  $26.80^\circ\text{C}$  of: a) DEAEEMA monomer and b) poly(DEAEEMA). The peak assignments correspond to the structures shown in Scheme 1 and 2.

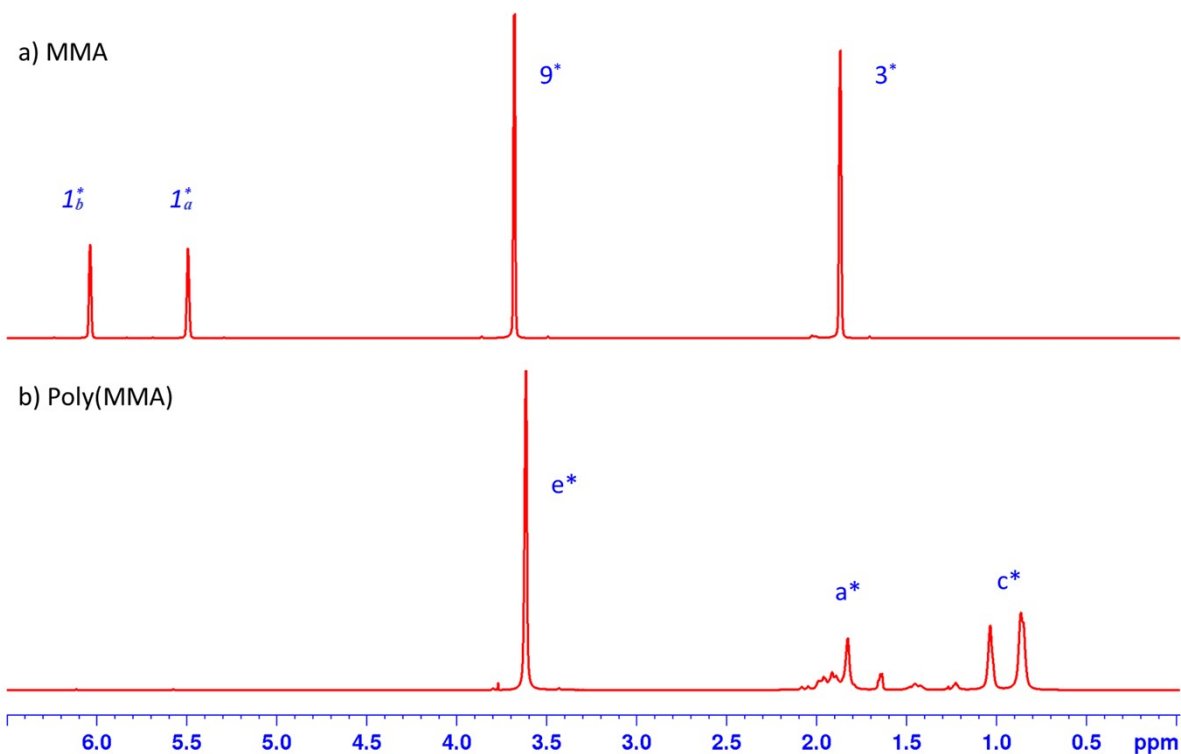

**Figure S5.** a) MMA monomer and b) Poly(MMA) spectra of  $^1\text{H-NMR}$  in  $\text{CD}_3\text{Cl}$  at 300 K. The peak assignments correspond to the structures shown in Scheme 1 and 2.

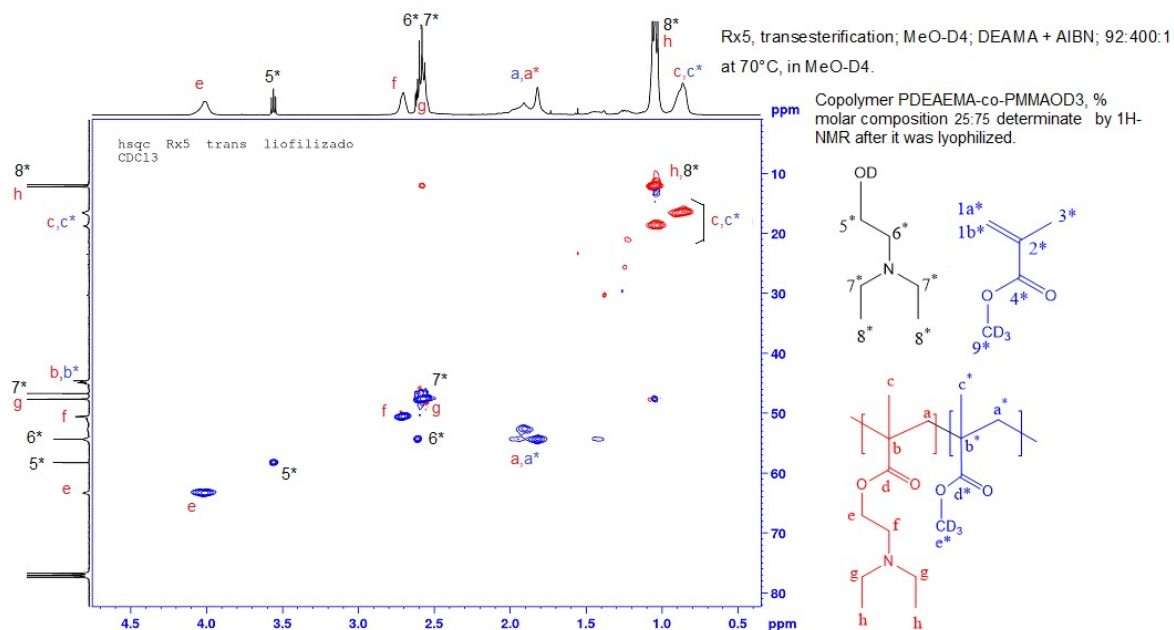

**Figure S6.** a) Edited HSQC (400 MHz,  $\text{CDCl}_3$ , r.t.) of copolymer Poly(DEAEMA-co-MMA- $\text{OD}_3$ ), % molar composition 25:75 determined by  $^1\text{H-NMR}$  after it was lyophilized at the end of kinetic.

### S.5. Kinetic study using a *pseudo*-first-order reaction.

A *pseudo*-first-order reaction is used to the kinetic analysis of the transesterification, and the apparent rate coefficients ( $k_{obs} = k_{tran}[CD_3OD]_0$ ) are estimated using the following expression, Equation (S1):

$$\ln\left(\frac{[DEAEMA]}{[DEAEMA]_0}\right) = k_{tran}[CD_3OD]_0t = k_{obs}t \quad (S1)$$

$$\ln(k_{obs}) = \ln(A) - \frac{E_A}{RT} \quad (S2)$$

where  $k_{obs}$  ( $s^{-1}$ ) denotes the observed rate coefficients,  $A$  ( $s^{-1}$ ) is the preexponential factor,  $E_A$  ( $kJ\ mol^{-1}$ ) is the activation energy,  $T$  (K) is the temperature. **Figure S7** shows the plots and the linear regressions where the slopes are proportional to the estimated value of  $k_{obs}$  showed in **Table S1**. A nonlinear behavior is seen for the experiments at high temperatures (60 and 70 °C) and low values of  $\omega_{M0}$  (10 and 30 wt%). **Table S1** also shows the half-lives ( $\tau_{1/2}$ ) of each reaction condition. For the experiment with  $\omega_{M0} = 10$  wt% and  $T = 70$  °C, the half of initial concentration of DEAEMA is converted to MMA-*d3* in only 1 h and increasing  $\omega_{M0} = 30$  wt% the time  $t_{1/2}$  is extended to 1.6 h.

**Table S1.** Kinetic rate coefficients estimated by a *pseudo*-first order reaction.

| $\omega_{M0}$<br>(wt.%) | $[DEAEMA]_0$<br>M | $T$<br>(°C) | $k_{obs}$<br>( $s^{-1}$ ) | $k_{tran}$<br>( $L\ mol^{-1}\ s^{-1}$ ) | $R^2$ | $t_{1/2}$<br>(h) |
|-------------------------|-------------------|-------------|---------------------------|-----------------------------------------|-------|------------------|
| 10                      | 0.44              | 26.80       | $1.86 \times 10^{-5}$     | $8.36 \times 10^{-7}$                   | 1.00  | 10.35            |
|                         |                   | 43.50       | $4.42 \times 10^{-5}$     | $2.00 \times 10^{-6}$                   | 0.99  | 4.35             |
|                         |                   | 60.00       | $1.10 \times 10^{-4}$     | $4.94 \times 10^{-6}$                   | 0.99  | 1.75             |
|                         |                   | 70.00       | $1.89 \times 10^{-4}$     | $8.50 \times 10^{-6}$                   | 1.00  | 1.02             |
| 30                      | 1.31              | 26.80       | $1.30 \times 10^{-5}$     | $7.40 \times 10^{-7}$                   | 1.00  | 14.82            |
|                         |                   | 43.50       | $3.55 \times 10^{-5}$     | $2.02 \times 10^{-6}$                   | 0.99  | 5.42             |
|                         |                   | 60.00       | $7.14 \times 10^{-5}$     | $4.05 \times 10^{-6}$                   | 0.99  | 2.70             |
|                         |                   | 70.00       | $1.15 \times 10^{-4}$     | $6.53 \times 10^{-6}$                   | 0.99  | 1.67             |
| 60                      | 2.85              | 26.80       | $2.3 \times 10^{-6}$      | $2.29 \times 10^{-7}$                   | 1.00  | 83.72            |



|  |  |       |                       |                       |      |       |
|--|--|-------|-----------------------|-----------------------|------|-------|
|  |  | 43.50 | $5.62 \times 10^{-6}$ | $5.77 \times 10^{-7}$ | 0.99 | 34.27 |
|  |  | 70.00 | $1.50 \times 10^{-5}$ | $1.53 \times 10^{-6}$ | 0.99 | 12.83 |

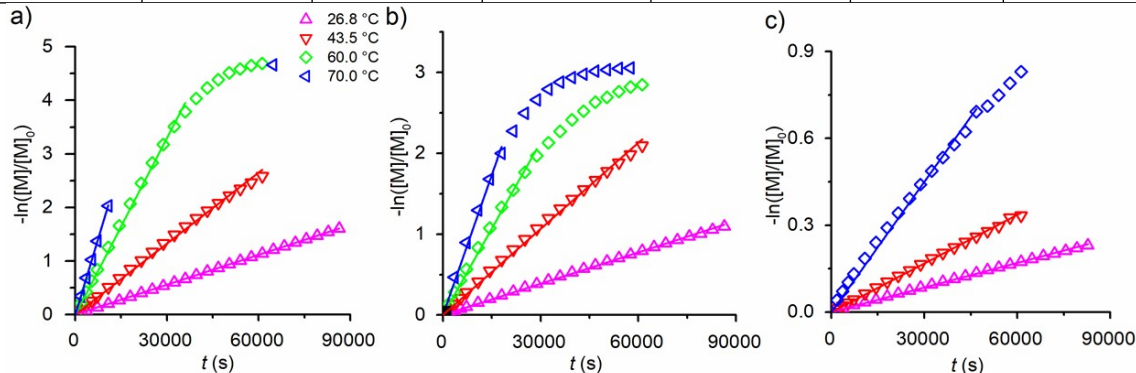

**Figure S7.** *Pseudo*-first-order kinetic plots for the transesterification analyzed with Eqn. S1, varying the temperature (labels) and  $\omega_{M0}$ : a) 10 wt%, b) 30 wt% and c) 60 wt%. Symbols are the experimental data and lines are regressions with the estimated values shown in Table S2.

### S.6. Validation of *pseudo*-first-order reaction, experimental data versus model.

In Figure S8 is the comparison between the experimental data and the predicted curves obtained by a *pseudo*-first-order reaction. Data are well described by the model for experiments with an excess of  $\text{CD}_3\text{OD}$ , also for that experiment with  $\omega_{M0} = 60$  wt%, but the last points of the latter present considerable discrepancies.

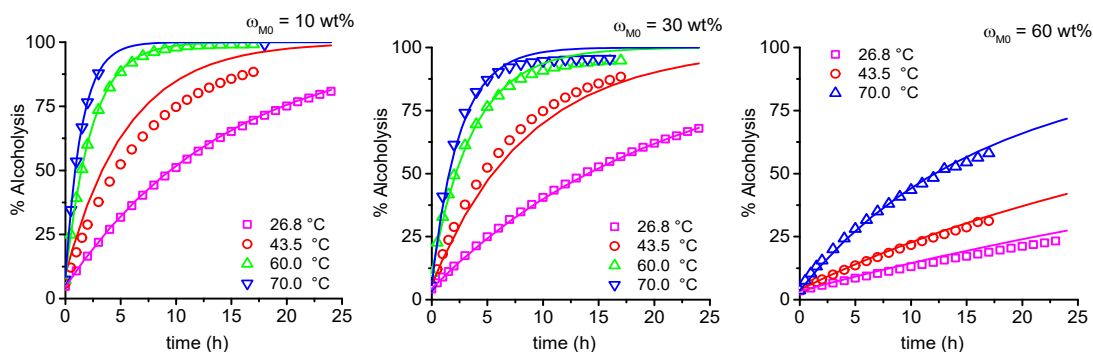

**Figure S8.** Evolution of the alcoholysis degree ( $D_A$ , mol%) in time and the variation of the reaction temperature (labels). The value of  $\omega_{M0}$  was varying at: a) 10, b) 30, and c) 60 wt%. Symbols are the experimental data obtained via  $^1\text{H-NRM}$  *in situ* measurements and lines

represent a model prediction with a *pseudo*-first-order kinetic equation and using Equations (X6-8).

### S.7. Estimation of the Arrhenius parameters $A$ and $E_a$ as a function of $[DEAEMA]_0$ or $\omega_{M0}$ .

#### $A$ and $E_a$ as a function of $[DEAEMA]_0$

The values of  $\ln(A)$  and  $E_A$  from **Table 2** of the main report, were used to know their dependency on the initial concentration of DEAEMA,  $[DEAEMA]_0$ . The preexponential factor,  $A$ , is linearly dependent on  $[DEAEMA]_0$  as shown in **Figure S9**  $[DEAEMA]_0$ , **Equation S3** obtained by a linear regression in Origin software (), resulting in a value of  $R^2 = 0.9997$ .

$$A \text{ (L mol}^{-1}\text{s}^{-1}\text{)} = -5.9726 (\pm 0.6141) + 1.6688 (\pm 0.0205)[DEAEMA]_0 \text{ (S3)}$$

Also,  $E_A$  is described by **Equation X8** with a second-order polynomial expression as shown in Figure Xb and using the dependent variable in logarithmic base.

$$E_A \text{ (kJ mol}^{-1}\text{)} = 22.0200 + 25.4789 \ln [DEAEMA]_0 - 6.8067 \ln [DEAEMA]_0^2 \text{ (S4)}$$

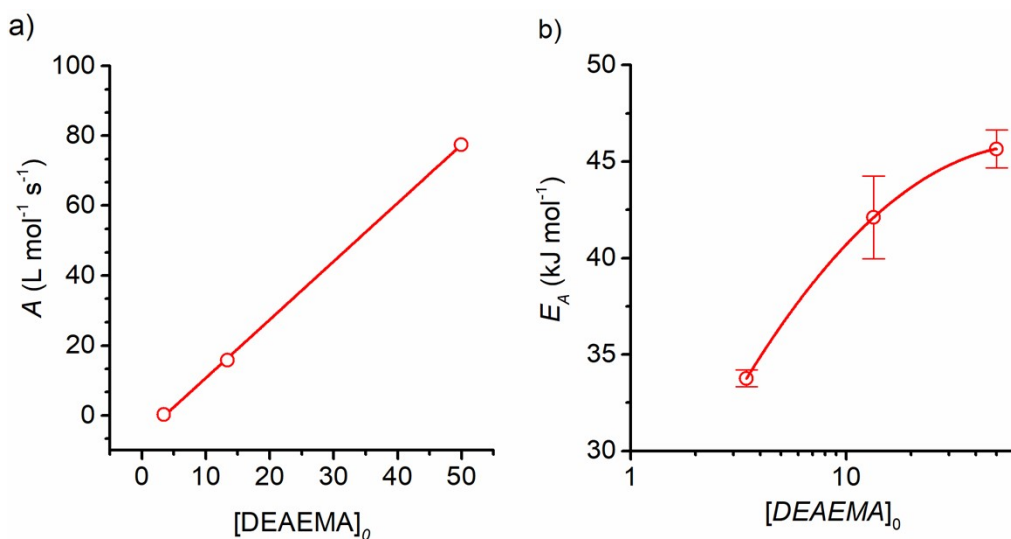

**Figure S9.** Best fit Arrhenius parameters (a)  $\ln(A)$  and (b)  $E_A$  values (data, see Table X3) determined for DEAEMA transesterification as a function of  $[DEAEMA]_0$ . Lines show fits summarized by **Equation S3 and S4**.

**A and  $E_a$  as a function of  $\omega_{M0}$**

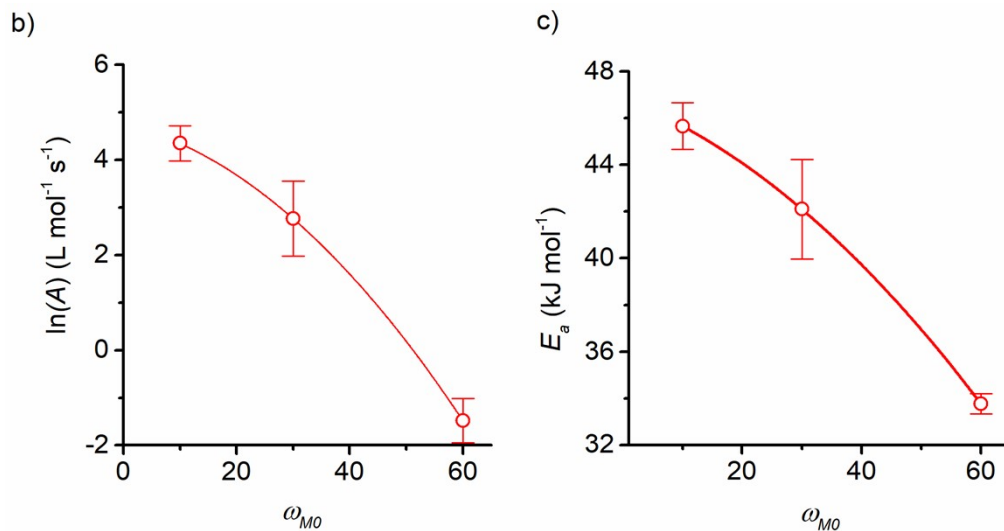

**Figure S10.** Best fit Arrhenius parameters (a)  $\ln(A)$  and (b)  $E_A$  values (data, see Table X3) determined for DEAEMA transesterification as a function of  $\omega_{M0}$ . Lines show quadratic fits summarized by **Equations 5 and 6** of the article.

### S.8. Calculations of transesterification, conversion, remaining monomer composition and copolymer composition.

i. Alkanolamine moles:

$$Am \text{ (moles)} = \frac{\int H_{7,6^*,7^*,g} - 2 \int H_5 - 2 \int H_e}{6} \quad (\text{S5})$$

ii. PMMA moles:

$$PMMA \text{ (moles)} = \frac{\int H_{5^*} + 9^* - 2 Am}{2} \quad (S6)$$

iii. Degree of alcoholysis

$$D_a \text{ (mol \%)} = \frac{2 Am}{\int H_{5^*} + \int H_5 + 2 Am} \times 100 \quad (S7)$$

iv. DEAEMA conversion

$$X_{DEAEMA} \text{ (mol \%)} = \frac{\int H_5}{\int H_{5^*} + \int H_5 + 2 Am} \times 100 \quad (S8)$$

v. % of remaining DEAEMA monomer in the reaction mixture

$$X_{DEAEMA} \text{ (mol \%)} = \frac{\int H_{5^*}}{\int H_{5^*} + \int H_5 + 2 Am} \times 100 \quad (S9)$$

vi. Remaining DEAEMA composition in the reaction mixture,  $f_{DEAEMA}$

$$f_{DEAEMA} \text{ (mol \%)} = \frac{\frac{\int H_5}{2}}{\frac{\int H_5}{2} + \frac{\int H_9}{3}} \quad (S10)$$

vii. Remaining MMA composition in the reaction mixture,  $f_{MMA}$

$$f_{MMA} \text{ (mol \%)} = 1 - f_{DEAEMA} \quad (S11)$$

viii. Cumulative copolymer composition of DEAEMA

$$F_{DEAEMA}(mol\%) = \frac{\int H_e}{\int H_e + 2PMMA} \quad (S12)$$

ix. Cumulative copolymer composition of MMA

$$F_{MMA}(mol\%) = 1 - F_{DEAEMA} \quad (S13)$$

### S.9. NMR spectroscopy and DCS of copolymers and

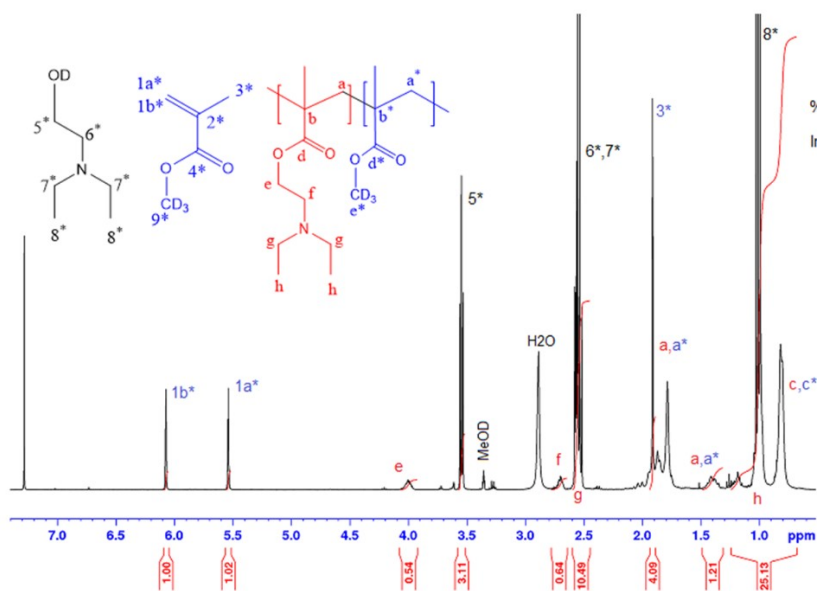

**Figure S11.** <sup>1</sup>H-NMR (400 MHz, CD<sub>3</sub>Cl, r.t.) spectra of the precipitated polymer with a resulting copolymer composition of (DEAEMA: MMA-*d*<sub>3</sub>) = 5:95 mol%. Initial conditions of the reaction: initial ratio  $\omega_{M0} = 10$  wt% and molar ratio DEAEMA: AIBN = 92:1 in CD<sub>3</sub>OD at 70°C, and a total time reaction of 17 h.

copolymer PDEAEMA-co-PMMA-OD<sub>3</sub> obtained by precipitation from CDCl<sub>3</sub> during 10 days.

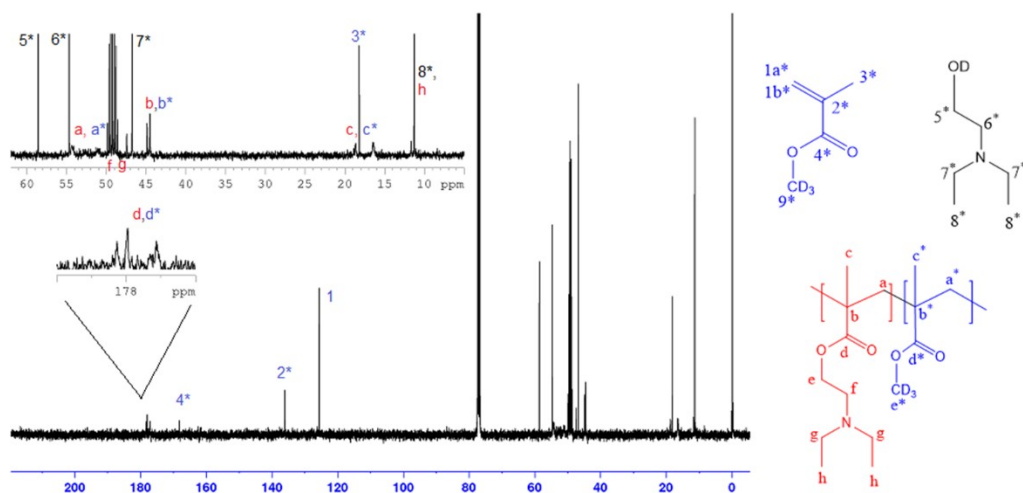

**Figure S12.**  $^{13}\text{C}\{^1\text{H}\}$ -NMR (100 MHz,  $\text{CDCl}_3$ , r.t) spectrum of copolymer PDEAEMA-co-PMMAOD<sub>3</sub>, % molar composition 5:95 obtained by  $^1\text{H}$ -NMR after it was precipitate from  $\text{CD}_3\text{OD}$ . Initial conditions of the reaction: 1:46 (DEAEMA:  $\text{CD}_3\text{OD}$ ) initial molar ratio,  $\omega_{M0} = 10$  wt% and molar ratio DEAEMA: AIBN = 92:1 in  $\text{CD}_3\text{OD}$  at  $70^\circ\text{C}$ , and a total time reaction of 17 h.

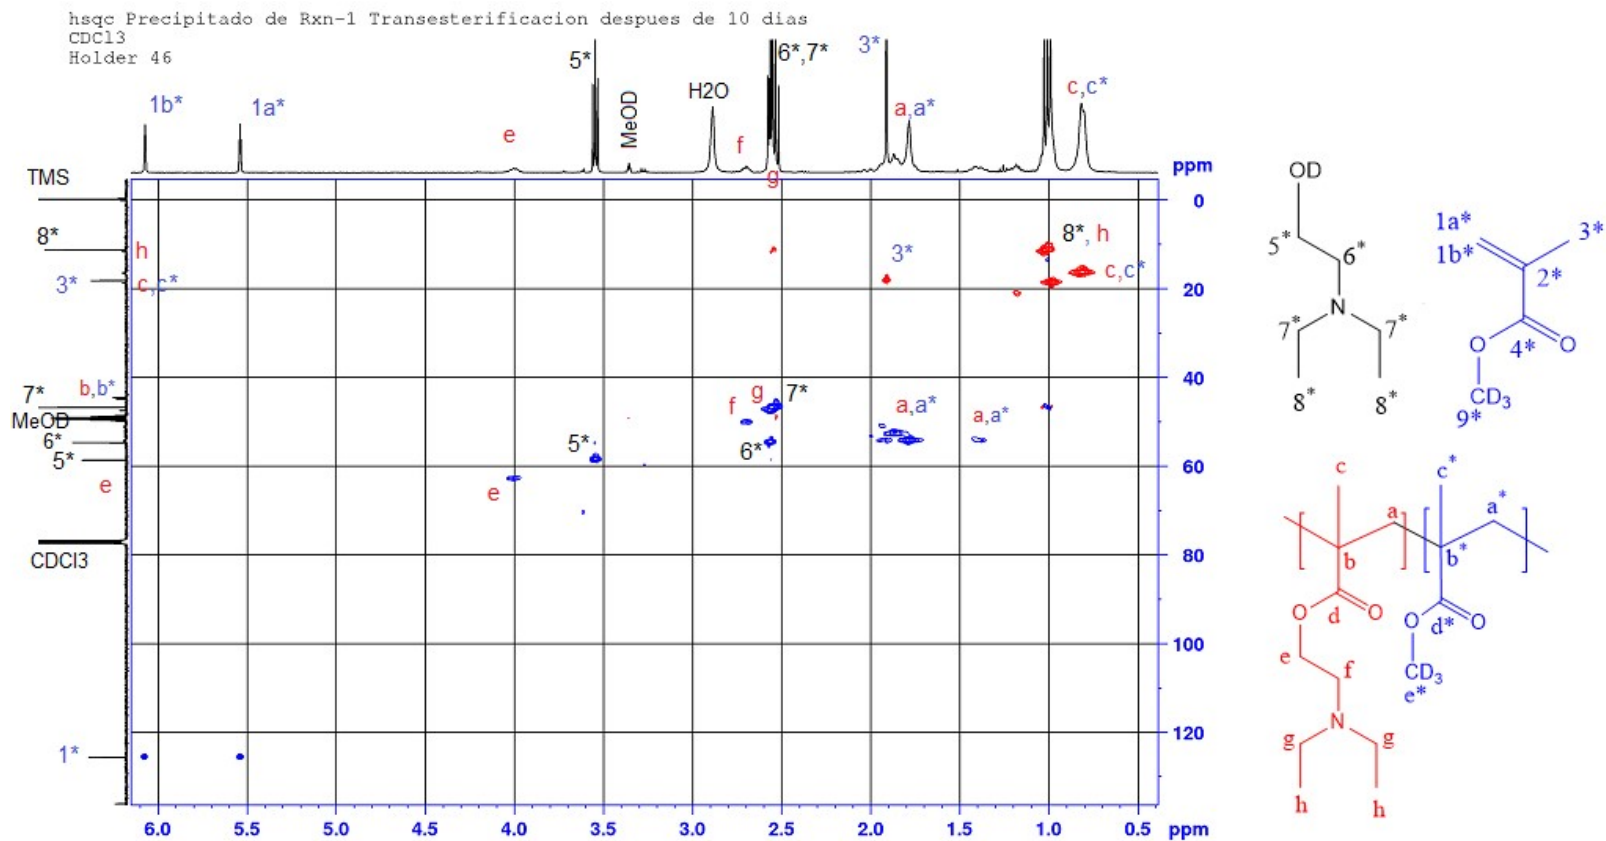

**Figure S13.** Edited HSQC (400MHz, CDCl<sub>3</sub>, r.t.) of copolymer PDEAEMA-co-PMMAOD<sub>3</sub>, after it was precipitate from CD<sub>3</sub>OD. Initial conditions of the reaction: initial molar ratio of DEAEMA: CD<sub>3</sub>OD = 1:46,  $\omega_{M0}$  = 10 wt% and molar ratio DEAEMA: AIBN = 92:1 in CD<sub>3</sub>OD at 70°C, and a total time reaction of 17 h.

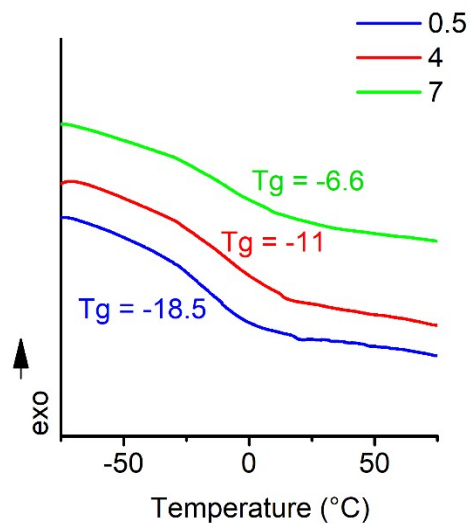

**Figure S14.** Stacked DSC thermograms for experiment with a mixture of methanol/  $\text{CDCl}_3$  at  $60\text{ }^\circ\text{C}$ , DEAEMA: AIBN molar ratio of 92: 1 and DEAEMA: methanol molar ratio of 1:8. Labels indicate the time reaction (hours).

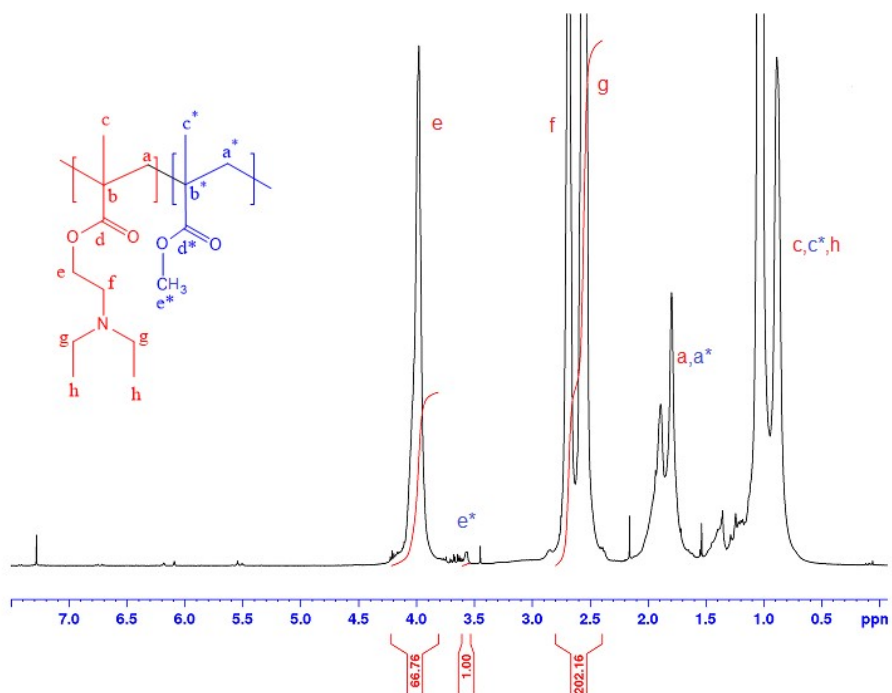

**Figure S15.**  $^1\text{H-NMR}$  (400 MHz,  $\text{CDCl}_3$ , r.t) spectrum of copolymer poly(DEAEMA-co-MMA- $d_3$ ), after it was lyophilized twice at the end of the kinetic. Initial conditions of the



reaction: initial molar ratio of DEAEMA: CH<sub>3</sub>OH = 1:1,  $\omega_{M0}$  = 58 wt% and molar ratio DEAEMA: AIBN = 92:1 in CDCl<sub>3</sub> at 70°C, and a total time reaction of 17 h.

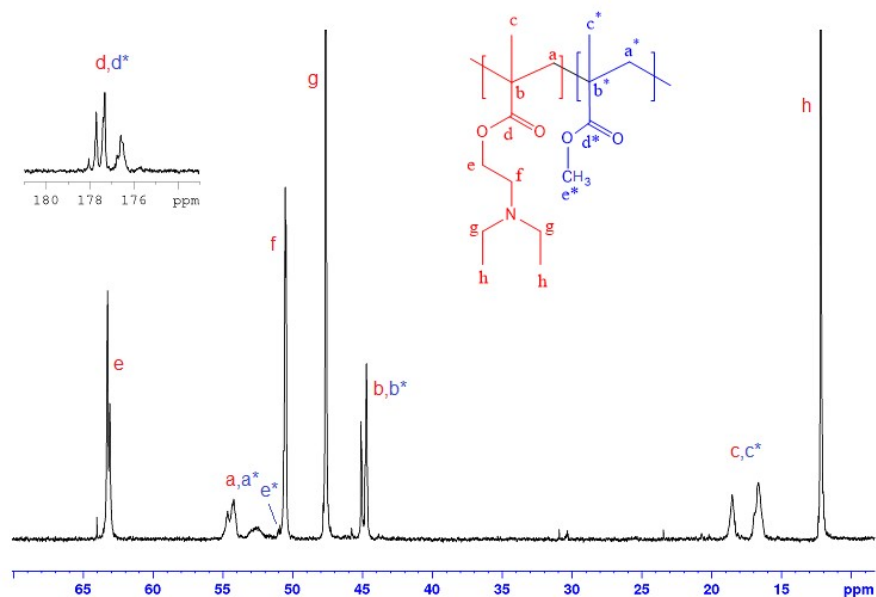

**Figure S16.** <sup>13</sup>C{<sup>1</sup>H}-NMR (100 MHz, CDCl<sub>3</sub>, r.t) spectrum of copolymer poly(DEAEMA-co-MMA-d<sub>3</sub>), % molar composition 99:1 obtained by <sup>1</sup>H-NMR after it was lyophilized at the end of kinetic. Initial conditions of the reaction: initial molar ratio of DEAEMA: CH<sub>3</sub>OH = 1: 1,  $\omega_{M0}$  = 58 wt% and molar ratio DEAEMA: AIBN = 92:1 in CDCl<sub>3</sub> at 70°C, and a total time reaction of 17 h.

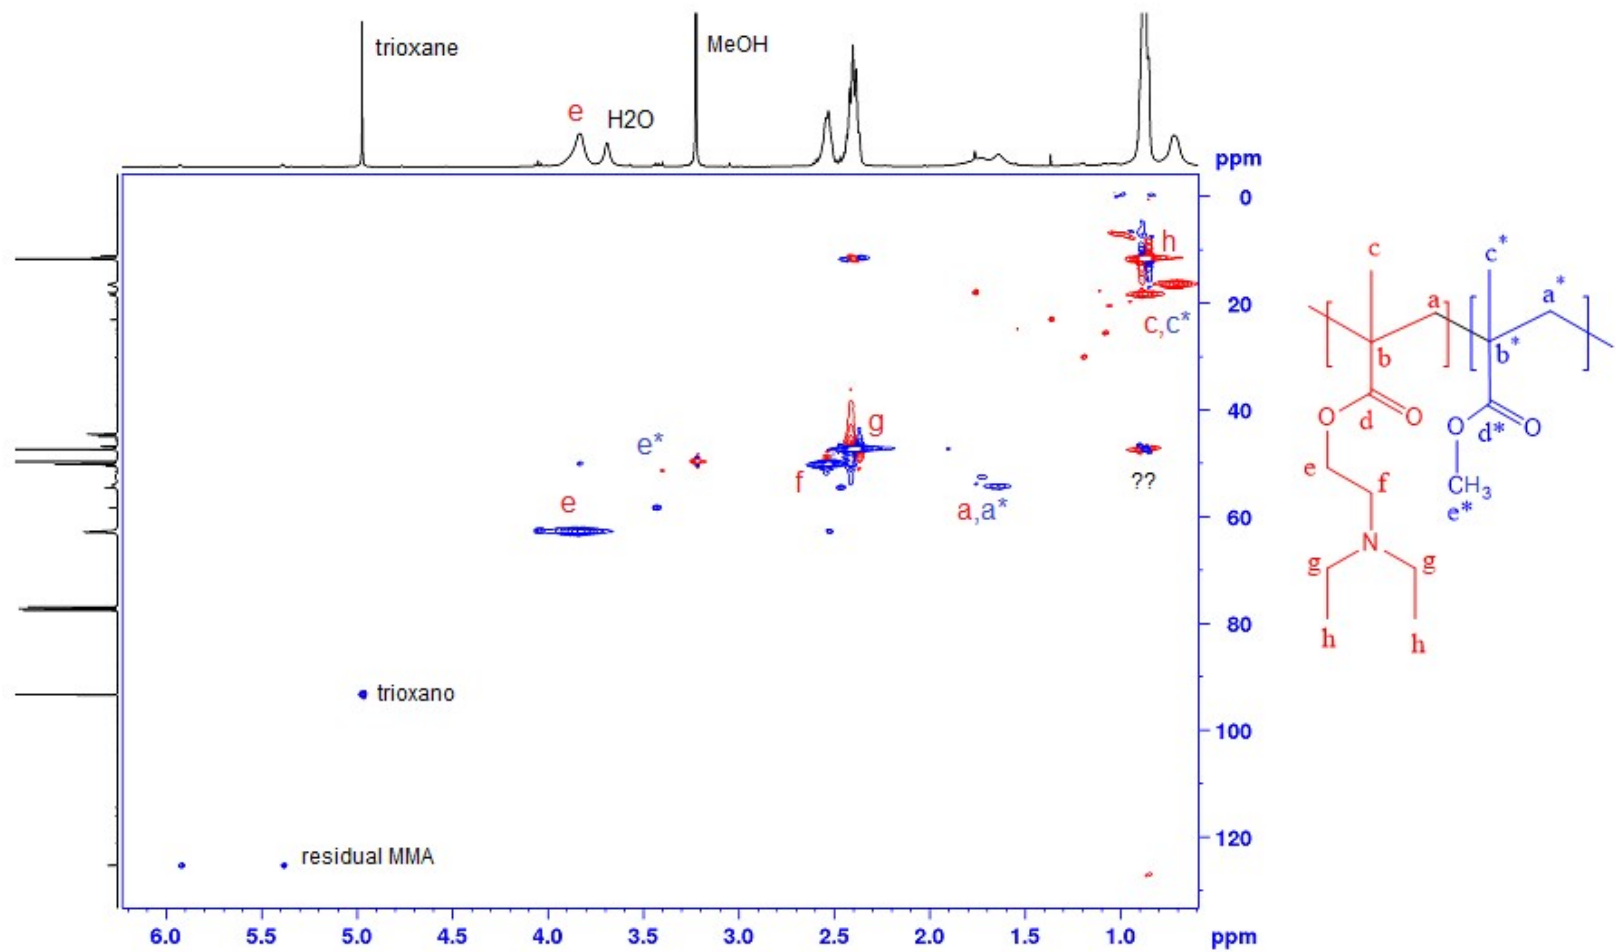

**Figure S17.** Edited HSQC (400MHz,  $\text{CDCl}_3$ , r.t.) of copolymer PDEAEMA-coPMMAOD<sub>3</sub>, after purified. Initial conditions of the reaction: 1:1 (DEAEMA:  $\text{CD}_3\text{OD}$ ) molar ratio,  $\omega_{M0}$  = 58 wt% and 92:1 (DEAEMA: AIBN) molar ratio in  $\text{CD}_3\text{OD}$  at 70°C and a total time reaction of 17 h.

## S.10. Precipitated polymer

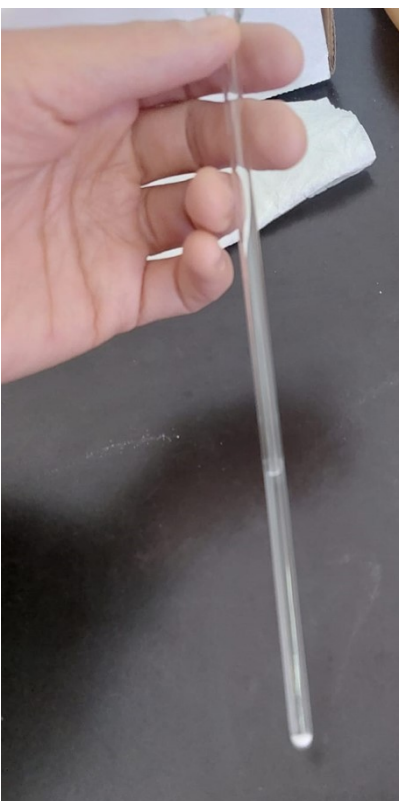

**Figure S18.** Picture of the precipitated polymer with a resulting copolymer composition of (DEAEMA: MMA-d3) = 96: 4 mol%. Initial conditions of the reaction: initial ratio  $\omega_{M0} = 10$  wt% and molar ratio DEAEMA: AIBN = 92: 1 in  $\text{CD}_3\text{OD}$  at  $70^\circ\text{C}$ , and a total time reaction of 17 h.
